# Supplementary material for: Synthesis of monodisperse mesoporous TiO2 spheres with tunable sizes between 0.6 and 3.1 μm and effects of reaction temperature, Ti source purity, and type of alkylamine on size and monodispersity
Source: Royal Society of Chemistry journal article supplement (doi:10.1039/c2cc30391d), 2012-01-01
Supplement: c2cc30391d.pdf [file c2cc30391d.pdf]

## Supporting Information

### Synthesis of Monodisperse Mesoporous TiO<sub>2</sub> Spheres with Tuneable Sizes between 0.6 and 3.1 μm and Effects of Reaction Temperature, Ti Source Purity, and Type of Alkylamine on Size and Monodispersity

Myun Pyo Hong, Jang Yong Kim, Koteswararo Vemula, Hyun Sung Kim, and  
Kyung Byung Yoon\*

### Contents

**SI-1.** Reaction conditions for the synthesis of MMTAs in the references cited in this work.

**SI-2.** Experimental Details

**SI-3.** Effects of reaction conditions on the size and monodispersity of MAPSs

**SI-4.** Lower magnification (3 K) SEM images of MAPSs

**SI-5.** Transformation of MAPSs to MMTSs by a hydrothermal reaction and calcination.

**SI-6.** SEM images of MAPSs and MMTSs.

**SI-7.** TEM images of MMTS.

**SI-8.** BET pore size distribution.

**SI-1. Reaction conditions for the synthesis of MMTSs in the references cited in this work.**

**Table SI-1.** Reaction conditions for the synthesis of MMTSs in the references cited in this work and the sizes and size distributions of the obtained MMTSs.

| Ti source                      | additives                                         | solvent                | Temp (°C) | Size (nm)  | Size distribution | Ref in text |
|--------------------------------|---------------------------------------------------|------------------------|-----------|------------|-------------------|-------------|
| TiCl <sub>4</sub>              | HCl, Na <sub>2</sub> SO <sub>4</sub>              | H <sub>2</sub> O       | 98        | up to 3800 | σ = 15-25%        | 1           |
| TiCl <sub>4</sub>              | -                                                 | H <sub>2</sub> O vapor | 96.5      | 60-600     | polydisperse      | 2           |
| Ti(OEt) <sub>4</sub>           | H <sub>2</sub> O                                  | ethanol                | 25        | 385-494    | σ = 10%           | 3           |
| Ti(OEt) <sub>4</sub>           | hydroxypropyl cellulose, H <sub>2</sub> O         | propanol               | 25        | 150-400    | σ = 10%           | 4           |
| Ti(OEt) <sub>4</sub>           | LiCl, H <sub>2</sub> O                            | ethanol                | r.t       | 700-2500   |                   | 5           |
| Ti(OEt) <sub>4</sub>           | NaCl or HCl, H <sub>2</sub> O                     | ethanol                | 25        | 800-1200   | σ = 15%           | 6           |
| Ti(O <i>i</i> Pr) <sub>4</sub> | hexadecylamine, KCl, H <sub>2</sub> O             | ethanol                | r.t       | 800        |                   | 7           |
| Ti(O <i>i</i> Pr) <sub>4</sub> | PS (S30RPC) beads                                 | -                      | 60        | 12000      |                   | 8           |
| TiCl <sub>4</sub>              | PS beads                                          | -                      | 60        | 5000       |                   | 9           |
| Ti(O <i>i</i> Pr) <sub>4</sub> | PS (S15RPC) beads                                 | -                      | 60        | 7100       |                   | 10          |
| Ti(O <i>i</i> Pr) <sub>4</sub> | mesoporous carbon                                 | -                      | -         | 500-800    |                   | 11          |
| TiOSO <sub>4</sub>             | glycerol, ethyl ether                             | ethanol                | 110       | 2000-5200  |                   | 12          |
| Ti(O <i>i</i> Pr) <sub>4</sub> | dodecylamine, NH <sub>4</sub> F                   | ethanol                | r.t       | 270        | ± 20 nm           | 13          |
| Ti(O <i>i</i> Pr) <sub>4</sub> | methyl amine                                      | acetonitrile ethanol   | r.t       | 250        |                   | 14          |
| Ti(O <i>i</i> Pr) <sub>4</sub> | methyl amine                                      | acetonitrile ethanol   | r.t       | 260-980    |                   | 15          |
| Ti(O <i>i</i> Pr) <sub>4</sub> | hexadecylamine, KCl, H <sub>2</sub> O             | ethanol                | r.t       | 830        | ± 40 nm           | 16          |
| Ti(O <i>i</i> Pr) <sub>4</sub> | hexadecylamine, KCl, H <sub>2</sub> O             | ethanol                | r.t       | 320-1150   | ± 40 nm           | 17          |
| Ti(OBu) <sub>4</sub>           | acetylacetone, H <sub>2</sub> O                   | butanol                | 140       | 300        |                   | 18          |
| Ti(Bu) <sub>4</sub>            | POPOPO, H <sub>2</sub> O                          | ethanol                | 35-40     | ~275       |                   | 19          |
| Ti(OBu) <sub>4</sub>           | ethylene glycol, H <sub>2</sub> O                 | acetone                | r.t       | 200-500    |                   | 20          |
| Ti(OBu) <sub>4</sub>           | citric acid, NH <sub>4</sub> OH, H <sub>2</sub> O | ethanol                | r.t       | ~300       | polydisperse      | 21          |
| Ti(Bu) <sub>4</sub>            | NH <sub>4</sub> HCO <sub>3</sub>                  | ethanol                | 180       | ~100       |                   | 22          |
| Ti(OBu) <sub>4</sub>           | ethylene glycol, H <sub>2</sub> O                 | acetone                | r.t       | ~500       |                   | 23          |

## SI-2. Experimental Details

### 2.1 Materials

Titanium isopropoxide (TIP, JUNSEI) was purified according to the following procedure. First, TIP (100 g, 98.0%) was distilled at 150 °C under vacuum ( $1 \times 10^{-2}$  Torr), and stored in a Schlenk flask (100 mL) filled with dry Ar. Ethanol was distilled on activated 4A molecular sieves under dry Ar and stored in a Schlenk flask (100 mL) under Ar. The Schlenk flasks containing purified TIP and ethanol, respectively, were kept in a glove box charged with dry Ar. A series of *n*-alkyl-amine ( $C_nH_{2n+1}NH_2$ ,  $n = 8, 10, 12, 14, \text{ and } 16$ ) were purchased from Aldrich and used as received.

### 2.2 Preparation of MAPSs

Preparation of solution A: In a glove box, distilled TIP (0.4 mL, 1.35 mmol) and dry EtOH (0.6 mL) were placed into a vial capped with a septum (this solution is designated as solution A).

Preparation of solution B: In a glove box, dry ethanol (EtOH, 20 mL, 342.5 mmol), dodecylamine (DDA, 0.124 g, 0.67 mmol), and a magnetic stirring bar were introduced into a three-necked round-bottomed flask and each neck was tightly capped with a septum. This three-necked flask was brought out from the glove box to bench and into which 0.16 mL (8.9 mmol) of distilled deionized water was added (this solution is designated as solution B).

Both the vial containing solution A and the three-necked flask containing solution were placed in an isopropanol bath whose temperatures were precisely controlled between 10 and -30 °C using an external chillier (See Fig. SI-2-1). To obtain -41 °C, acetonitrile and dry ice were used. When the temperatures of both solutions were equilibrated to that of the bath, solution A was quickly transferred to solution B with the help of a cannula while solution B was being vigorously stirred. The standard molar ratio of the reagents was TIP:RNH<sub>2</sub>:H<sub>2</sub>O:EtOH = 1.0:0.5:6.6:253.7.

### 2.3. Crystallization of MAPSs into MMTSs

*Hydrothermal Reaction.* MAPS powder (0.1g) was introduced into a Teflon-lined autoclave (30 mL capacity) containing a mixture of EtOH (0.625 mL) and DDW (1.25 mL). The heterogeneous solution was sealed and heated at 160 °C for 16 h. After cooling, the solid particles were collected by centrifugation and the particles were washed with EtOH and water and subsequently dried in an oven.

*Calcination.* The MMTS powder was calcined at 500 °C for 6 h with the heating rate of 5 °C/min in the atmosphere to remove any remaining organic template.

### 2.4. Instrumentation

The scanning electron microscope (SEM) images of zeolite films were obtained from a FE-SEM (Hitachi S 4300) at an acceleration voltage 20 kV. The N<sub>2</sub> sorption analysis for measuring surface area and pore diameter was performed at 77 K by BELSORP-max volumetric adsorption equipment. Powder X-ray diffraction (XRD) patterns were obtained from a Rigaku D/MAX-2500/pc diffractometer.

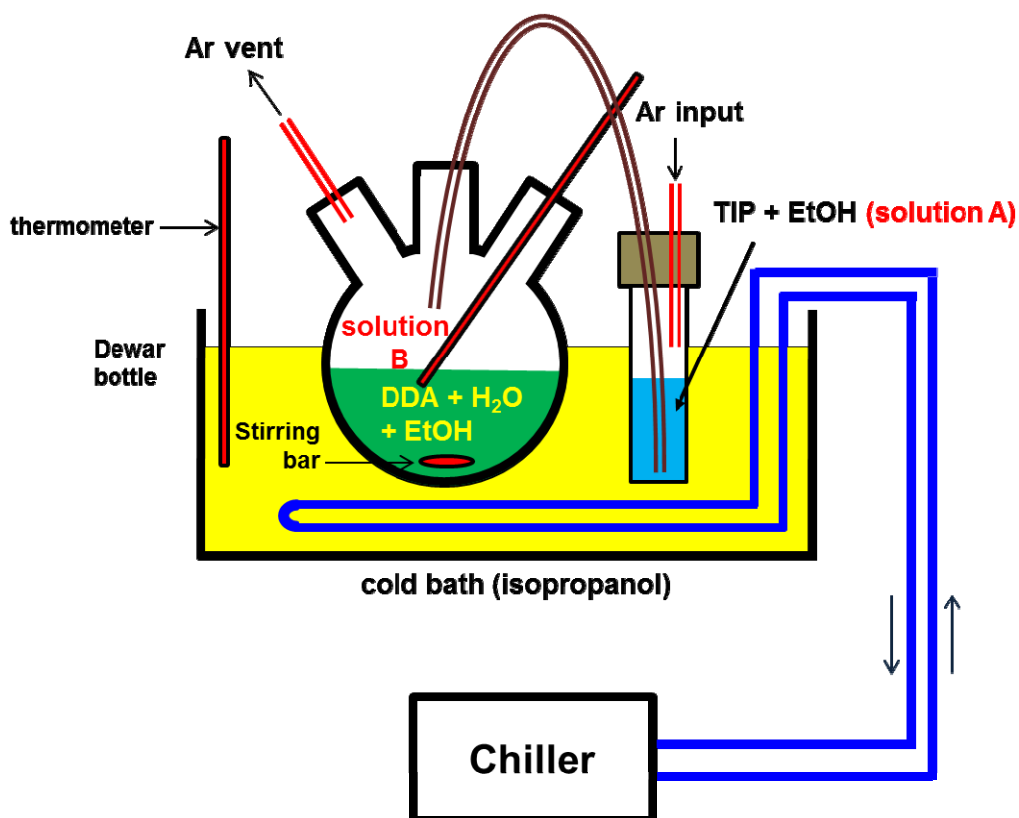

**Fig. SI-2-1.** Schematic illustration of the reaction setup used for the preparation of MAPSs. The temperature of the cold bath was controlled by the chiller. After both solutions A and B were equilibrated at the desired temperature, solution B was quickly transferred to the three-necked round bottomed flask containing solution B, while solution B was vigorously stirred. The temperature of solution B increased by 0.5 °C during the hydrolysis of TIP, indicating that the amount of heat generated during the hydrolysis of TIP in the three-neck flask was not significant.

### SI-3. Effects of reaction conditions on the size and monodispersity of MAPSs

Table SI-3-1. Effects of mole ratio and reaction temperature on the size and monodispersity of MAPSs with dodecylamine as the additive.

| Mole ratio<br>(TIP:DDA:H <sub>2</sub> O:EtOH) | Temperature (°C) | Size<br>(nm) | σ(%) | Remarks of<br>TIP |
|-----------------------------------------------|------------------|--------------|------|-------------------|
| 1:0.5:6.6:253.7                               | 23               | 700          | 28.6 | Distilled         |
|                                               | 10               | 720          | 20.1 | "                 |
|                                               | 5                | 780          | 11.5 | "                 |
|                                               | 0                | 900          | 3.6  | "                 |
|                                               | -5               | 1200         | 2.6  | "                 |
|                                               | -10              | 1600         | 1.9  | "                 |
|                                               | -15              | 1800         | 1.7  | "                 |
|                                               | -20              | 2040         | 1.5  | "                 |
|                                               | -25              | 2150         | 7.4  | "                 |
|                                               | -30              | 2580         | 11.6 | "                 |
| -41                                           | 2830             | 28.6         | "    |                   |
| 1:0.5:6.6:253.7                               | 23               | 550          | 30.5 | As received       |
|                                               | 10               | 620          | 15.4 | "                 |
|                                               | 5                | 730          | 10.7 | "                 |
|                                               | 0                | 920          | 12.5 | "                 |
|                                               | -5               | 1010         | 9.1  | "                 |
|                                               | -10              | 1120         | 13.9 | "                 |
|                                               | -15              | 1140         | 8.7  | "                 |
|                                               | -20              | 1210         | 12.3 | "                 |
|                                               | -25              | 1310         | 16.5 | "                 |
|                                               | -30              | 1520         | 23.4 | "                 |
| -41                                           | 1710             | 37.1         | "    |                   |
| 1:0.5:4.4:253.7                               | 23               | 950          | 20.0 | Distilled         |
| 1:0.5:3.3:253.7                               | 23               | 1120         | 8.3  | "                 |
| 1:0.5:2.2:253.7                               | 23               | 1450         | 12.3 | "                 |
| 1:0.5:4.4:253.7                               | -20              | 2340         | 11.4 | "                 |
| 1:0.5:3.3:253.7                               | -20              | 2610         | 25.1 | "                 |
| 1:0.5:0.0:253.7                               | -20              | no rxn       | -    | "                 |
| 1:0.5:6.6:507.4                               | 23               | 1130         | 8.5  | "                 |
| 1:0.5:6.6:761.1                               | 23               | 1450         | 11.1 | "                 |
| 1:0.5:6.6:507.4                               | -20              | 2690         | 10.3 | "                 |
| 1:0.5:6.6:761.1                               | -20              | 3060         | 16.8 | "                 |
| 0.25:0.5:6.6:253.7                            | 23               | 1230         | 23.5 | "                 |
| 0.50:0.5:6.6:253.7                            | 23               | 1050         | 20.1 | "                 |
| 0.75:0.5:6.6:253.7                            | 23               | 860          | 17.3 | "                 |
| 1.38:0.5:6.6:253.7                            | 23               | 630          | 10.2 | "                 |
| 0.25:0.5:6.6:253.7                            | -20              | 2610         | 20.1 | "                 |
| 0.50:0.5:6.6:253.7                            | -20              | 2480         | 12.6 | "                 |
| 0.75:0.5:6.6:253.7                            | -20              | 2120         | 9.5  | "                 |
| 1.38:0.5:6.6:253.7                            | -20              | 1770         | 3.5  | "                 |

**Table SI-3-2.** Effect of the type of alkylamine on the size and monodispersity of MAPSs during their synthesis at -20 °C with the mole ratio of TIP:DDA:H<sub>2</sub>O:EtOH = 1:0.5:6.6:253.7.

| NH <sub>2</sub> -C <sub>n</sub> H <sub>2n+1</sub> | Temperature (°C) | Size (nm) | σ(%) | Remarks of TIP |
|---------------------------------------------------|------------------|-----------|------|----------------|
| 8                                                 | -20              | 1900      | 8.5  | Distilled      |
| 10                                                | "                | 1940      | 2.5  | "              |
| 12                                                | "                | 2040      | 1.5  | "              |
| 14                                                | "                | 1800      | 2.1  | "              |
| 16                                                | "                | 1950      | 7.3  | "              |

#### SI-4. Lower magnification (3 K) SEM images of MAPSs

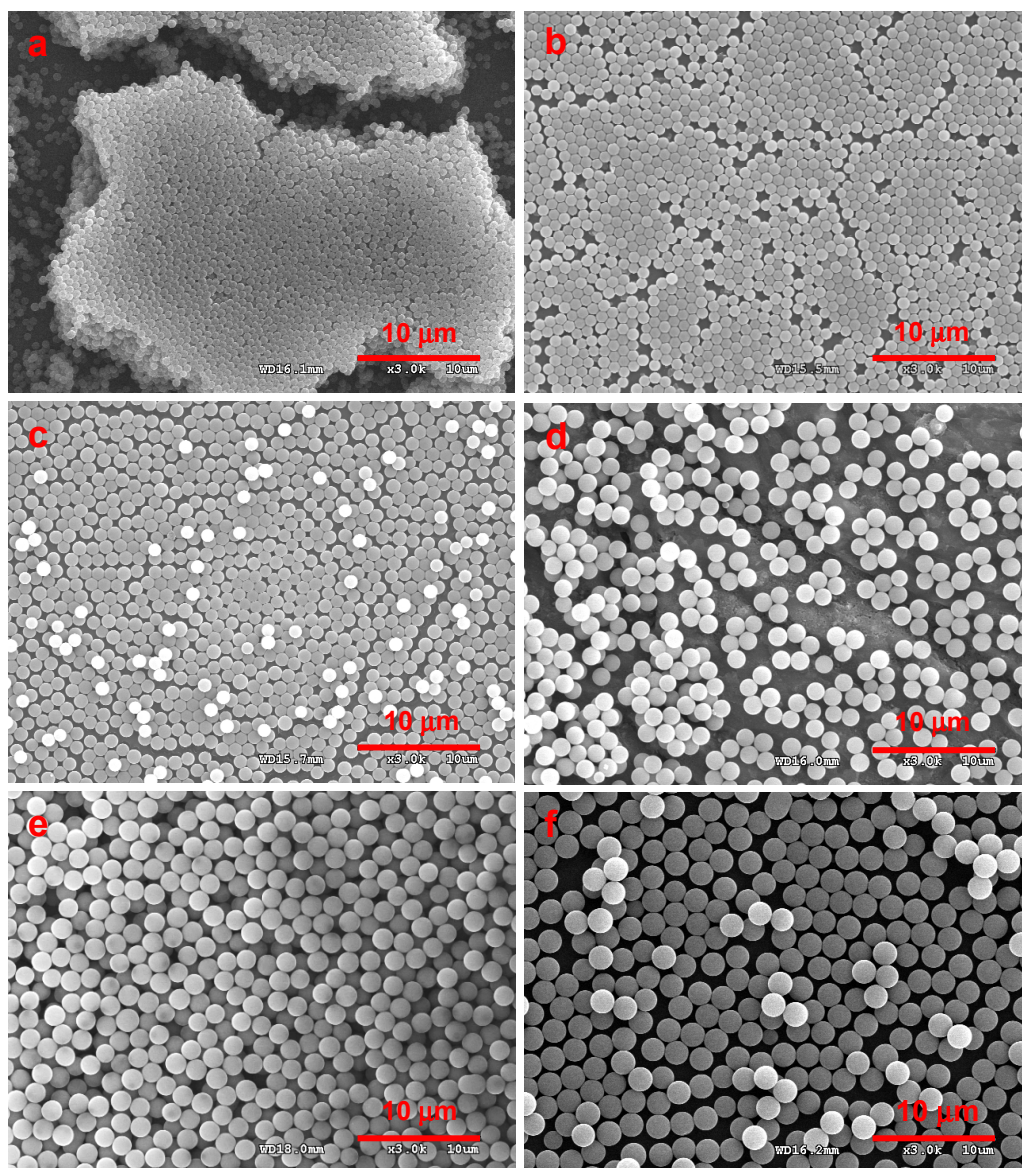

**Fig. SI-4-1.** Lower magnification (3 K) SEM images of MAPSs synthesized at various temperatures; 23 (a), 0 (b), -5 (c), -10 (d), -15 (e), and -20 °C (f) respectively.



**SI-5. Transformation of MAPSs to MMTSs by a hydrothermal reaction and calcination.**

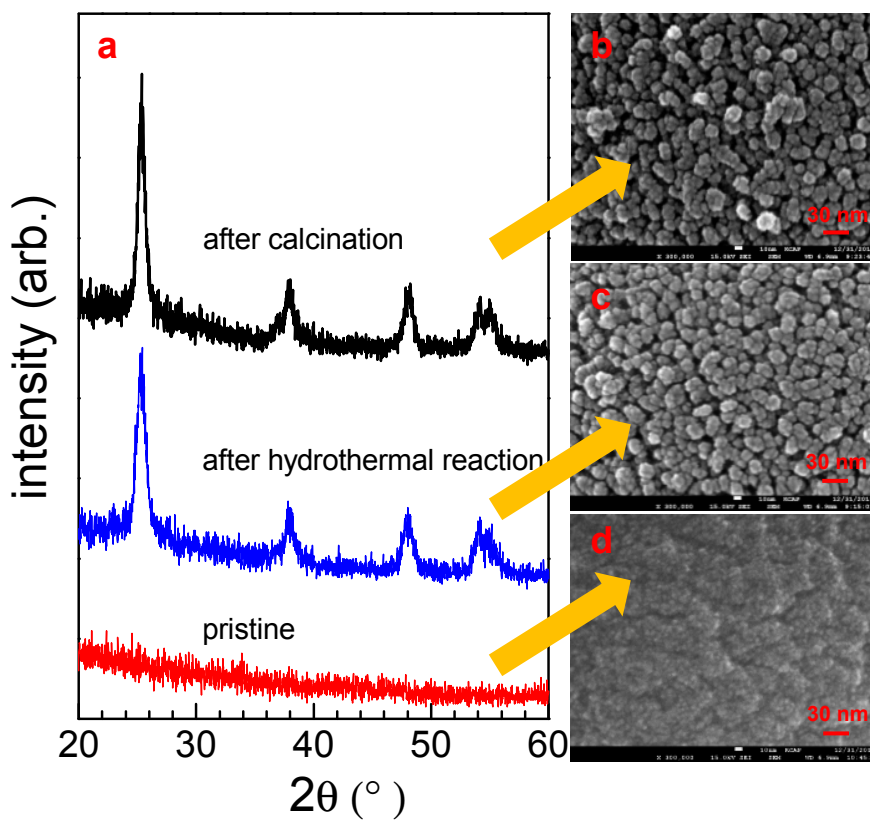

**Fig. SI-5-1.** XRD powder diffraction pattern (a) and the corresponding SEM image of MAPS after hydrothermal reaction and calcination (b-d, as indicated).



### SI-6. SEM images of MAPSs and MMTSs.

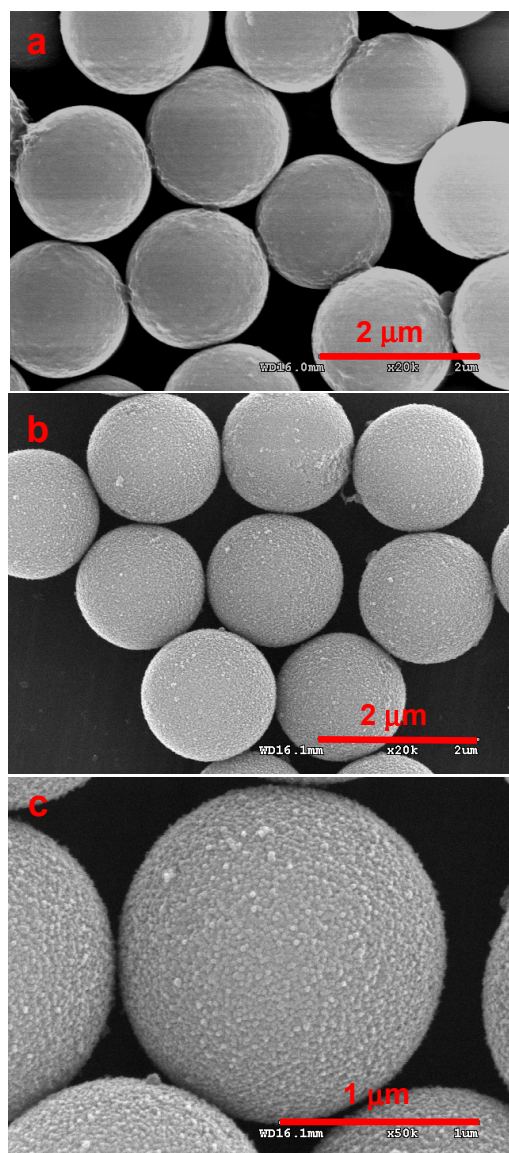

**Fig. SI-6-1.** SEM images of 1.8  $\mu\text{m}$  MAPSs (a), 1.6  $\mu\text{m}$  MMTSs obtained by hydrothermal reaction (b) and calcination (c)

**SI-7. TEM images of MMTS.**

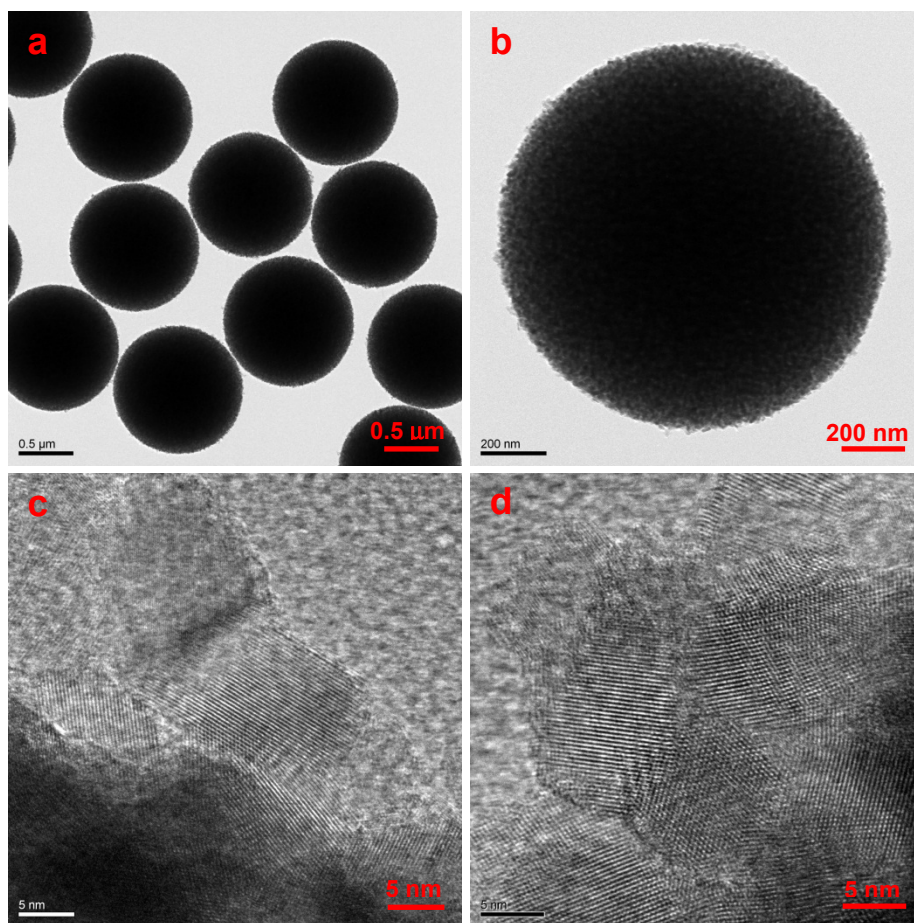

**Fig. SI-7-1.** TEM images of 1.1 μm MMTSs obtained by hydrothermal reaction at different magnifications (as indicated by the scale bar).

### SI-8. BET pore size distribution.

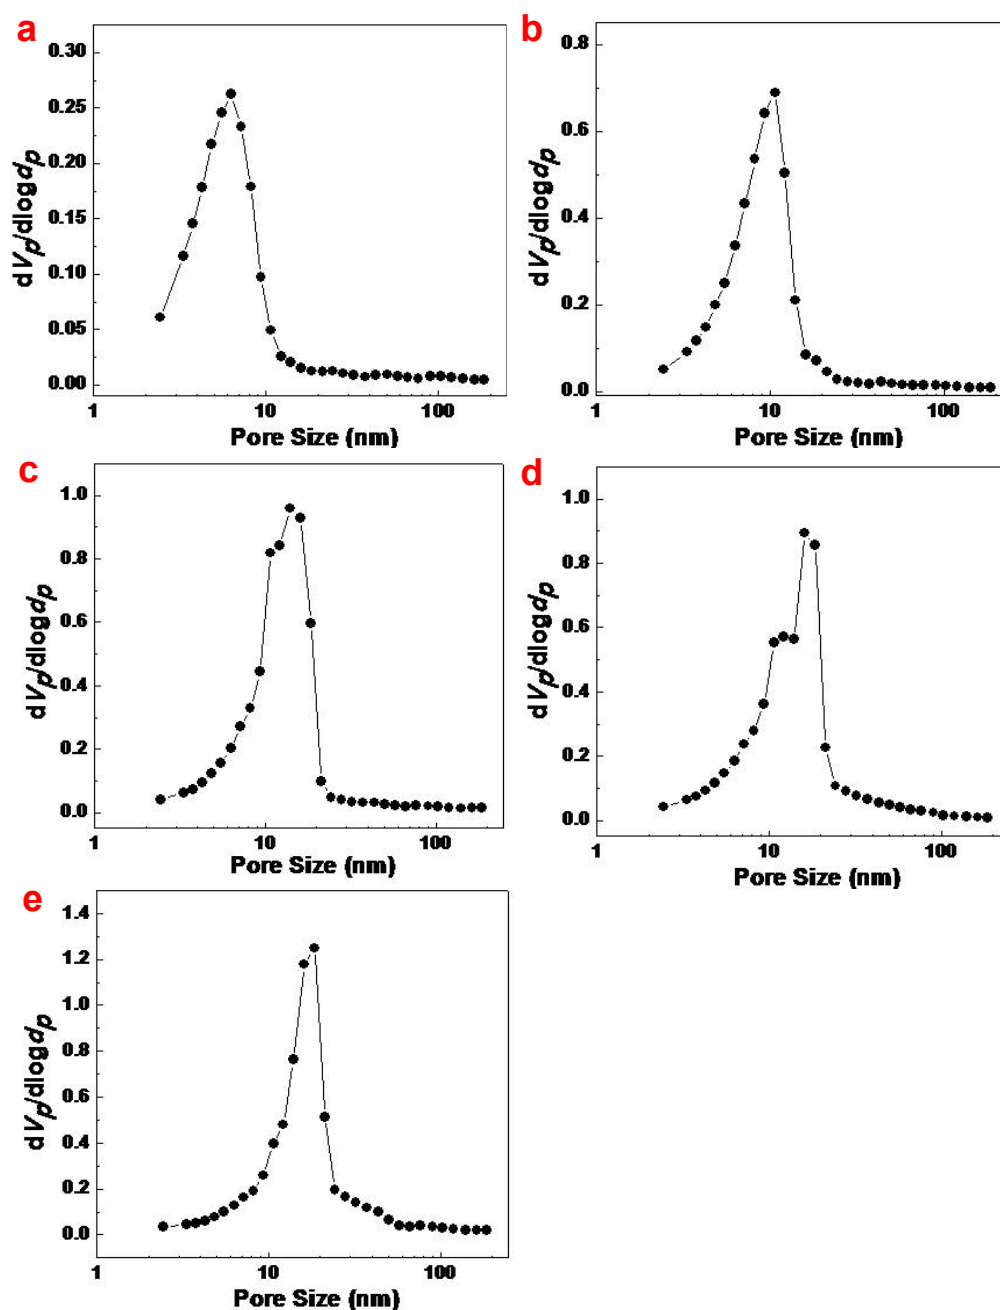

**Fig. SI-8-1.** BET Pores size distributions of MMTs obtained from the reaction mixtures having different alkylamines; octylamine (a), decylamine (b), dodecylamine (c), tetradecylamine (d), and hexadecylamine (e).
